# Supplementary material for: Development of a HiFi‐LAMP Assay for Detection of Herpes simplex virus type 1
Source: Research Square preprint supplement (doi:10.21203/rs.3.rs-8728651/v1), 2026-02-18
Supplement: Supplementary file 1 [file 5b653bff86b0113d332bbe95.docx]

**Supplementary Information**

Development of a HiFi‐LAMP Assay for Detection of Herpes simplex virus type 1

Ziyan Wang 1,2,3, Zhenzhou Wan 2,*, Yongjuan Zhao 3, Zhengfang Wang 4, Shangwen Song 4, Zhi-Gang Song 3, Yu-Ye Li4, Chiyu Zhang 3,*

1 School of Medicine, Anhui University of Science and Technology, Huainan, 232001, China

2 Medical Laboratory of Taizhou Fourth People’s Hospital, Taizhou, 225300, China

3 Shanghai Public Health Clinical Center, Fudan University, Shanghai, 201508, China

4 Department of Dermatology and Venereology, First Affiliated Hospital of Kunming Medical University, Kunming, 650032, China

* Correspondence: Zhenzhou Wan, wanlv@126.com, or Chiyu Zhang, chiyu_zhang1999@163.com

**Table S1.** Primers and probes used for LAMP in this study

| Viruses | Primer sets | Primers/probes | Primer sequence (5'-3') | Length (nt) | Refs. |
| --- | --- | --- | --- | --- | --- |
| HSV-1 | Set 1 | F3 | CAGCCACACACCTGTGAA | 18 | 1 |
| B3 | TCCGTCGAGGCATCGTTAG | 19 |
| FIP | CCAGACGTTCCGTTGGTAGGTCTTTTACTTTGACTGTTCGCGCACC | 46 |
| BIP | CCATCATCGCCACGTCGGACTTTTTCGGCGTCTGCTTTTTGTG | 43 |
| LF | AAATCCTGTCGCCCTACACAGCGG | 24 |
| LB | CACCCCGCGACGGGACGCCG | 20 |
| set 2 | F3 | GCCTCTGGACTGGACCAC | 18 | This study |
| B3 | CCTGGCCGATGATAACCAC | 19 |
| FIP | GCCAGCTCAGGCTCCATCAGGTTTCGGCGTGTGTTTCTG | 39 |
| BIP | TAATCGTCGGTGCCAGACCGAGTCGGGGGTGCAATAACG | 39 |
| LB | GCCGCGGGAGGATGTGTTTT | 20 |
| set 3 | F3 | GCCGTTGTTCCCATTATCCC | 20 | 2 |
| B3 | TACTTGGCATGGGGGGTG | 18 |
| FIP | GTTGGGTGGTGGAGGAGACGTCCTTTTGGTTCTTGTCGGT | 39 |
| BIP | GGTCGTCCCTCGCATGAAGCGGCGTGGTAAGGCTGATG | 38 |
| LF | TTGGTGGGAACCCCCGATAC | 20 |
| LB | AACATGACCCAGACCGGCAC | 20 |
| LF-probe | BHQ1-TTGGTGGGAACCCCCGATAC-FAM | 20 |
| LB-probe | BHQ1-AACATGACCCAGACCGGCAC-FAM | 20 |
| set 4 | F3 | GAAGCCCCCAACATGACC | 18 | This study |
| B3 | CAGCCAACGGGAAGGC | 16 |
| FIP | TCCGATACTTGGCATGGGGGGTACTCTCCCACCGCCATCA | 40 |
| BIP | GAGGAAGAGGAGGAGGGGGCTAGGGTGTCACGGGTCC | 37 |
| LF | TGGTCGGGCGTGGTAAG | 17 |
| LB | GGGACGGCGAACATCTTGAGG | 21 |
| set 5 | F3 | ACCCCCCATGCCAAGT | 16 | This study |
| B3 | GGGGAGTTGTTGGGATCGG | 19 |
| FIP | GGTCCCATCTCCCCCCTCAAGATGGACTGGAGGAGGAGGAA | 41 |
| BIP | CGTGACACCCTACCCCAGTCCCGGGACGGTTGGGTTTGTC | 40 |
| LB | CAGCCTTCCCGTTGGCTG | 18 |
| LB2 | TTCCCGTTGGCTGAGGAC | 18 |
| LB-probe | BHQ1-CAGCCTTCCCGTTGGCTG-FAM | 18 |
| LB2-probe | BHQ1-TTCCCGTTGGCTGAGGAC-FAM | 18 |

**Table S2.** The information of the primers used in the qPCR assay.

| Primer sets | Primer name | Primer sequence (5'-3') | Length (nt) | Refs. |
| --- | --- | --- | --- | --- |
| HSV-1 | F | CGGCCGTGTGACACTATCG | 19 | 3 |
| R | CTCGTAAAATGGCCCCTCC | 19 |
| Probe | FAM-CCATACCGACCACACCGACGAATC-BHQ1 | 24 |

**Table S3.** Comparison between the HiFi-LAMP method and the qPCR method with clinical samples.

|  |  | **qPCR** | | **Total** |
| --- | --- | --- | --- | --- |
|  |  | + | - |  |
| **HiFi-LAMP(HSV-1)** | + | 5 | 0 | 5 |
| - | 0 | 25 | 25 |
| **Total** |  | 5 | 25 | 30 |
| *Relative sensitivity=5/5=100%* | | | | |
| *Relative specificity=25/25=100%* | | | | |
| *Compliance rate =30/30=100%* | | | | |

**
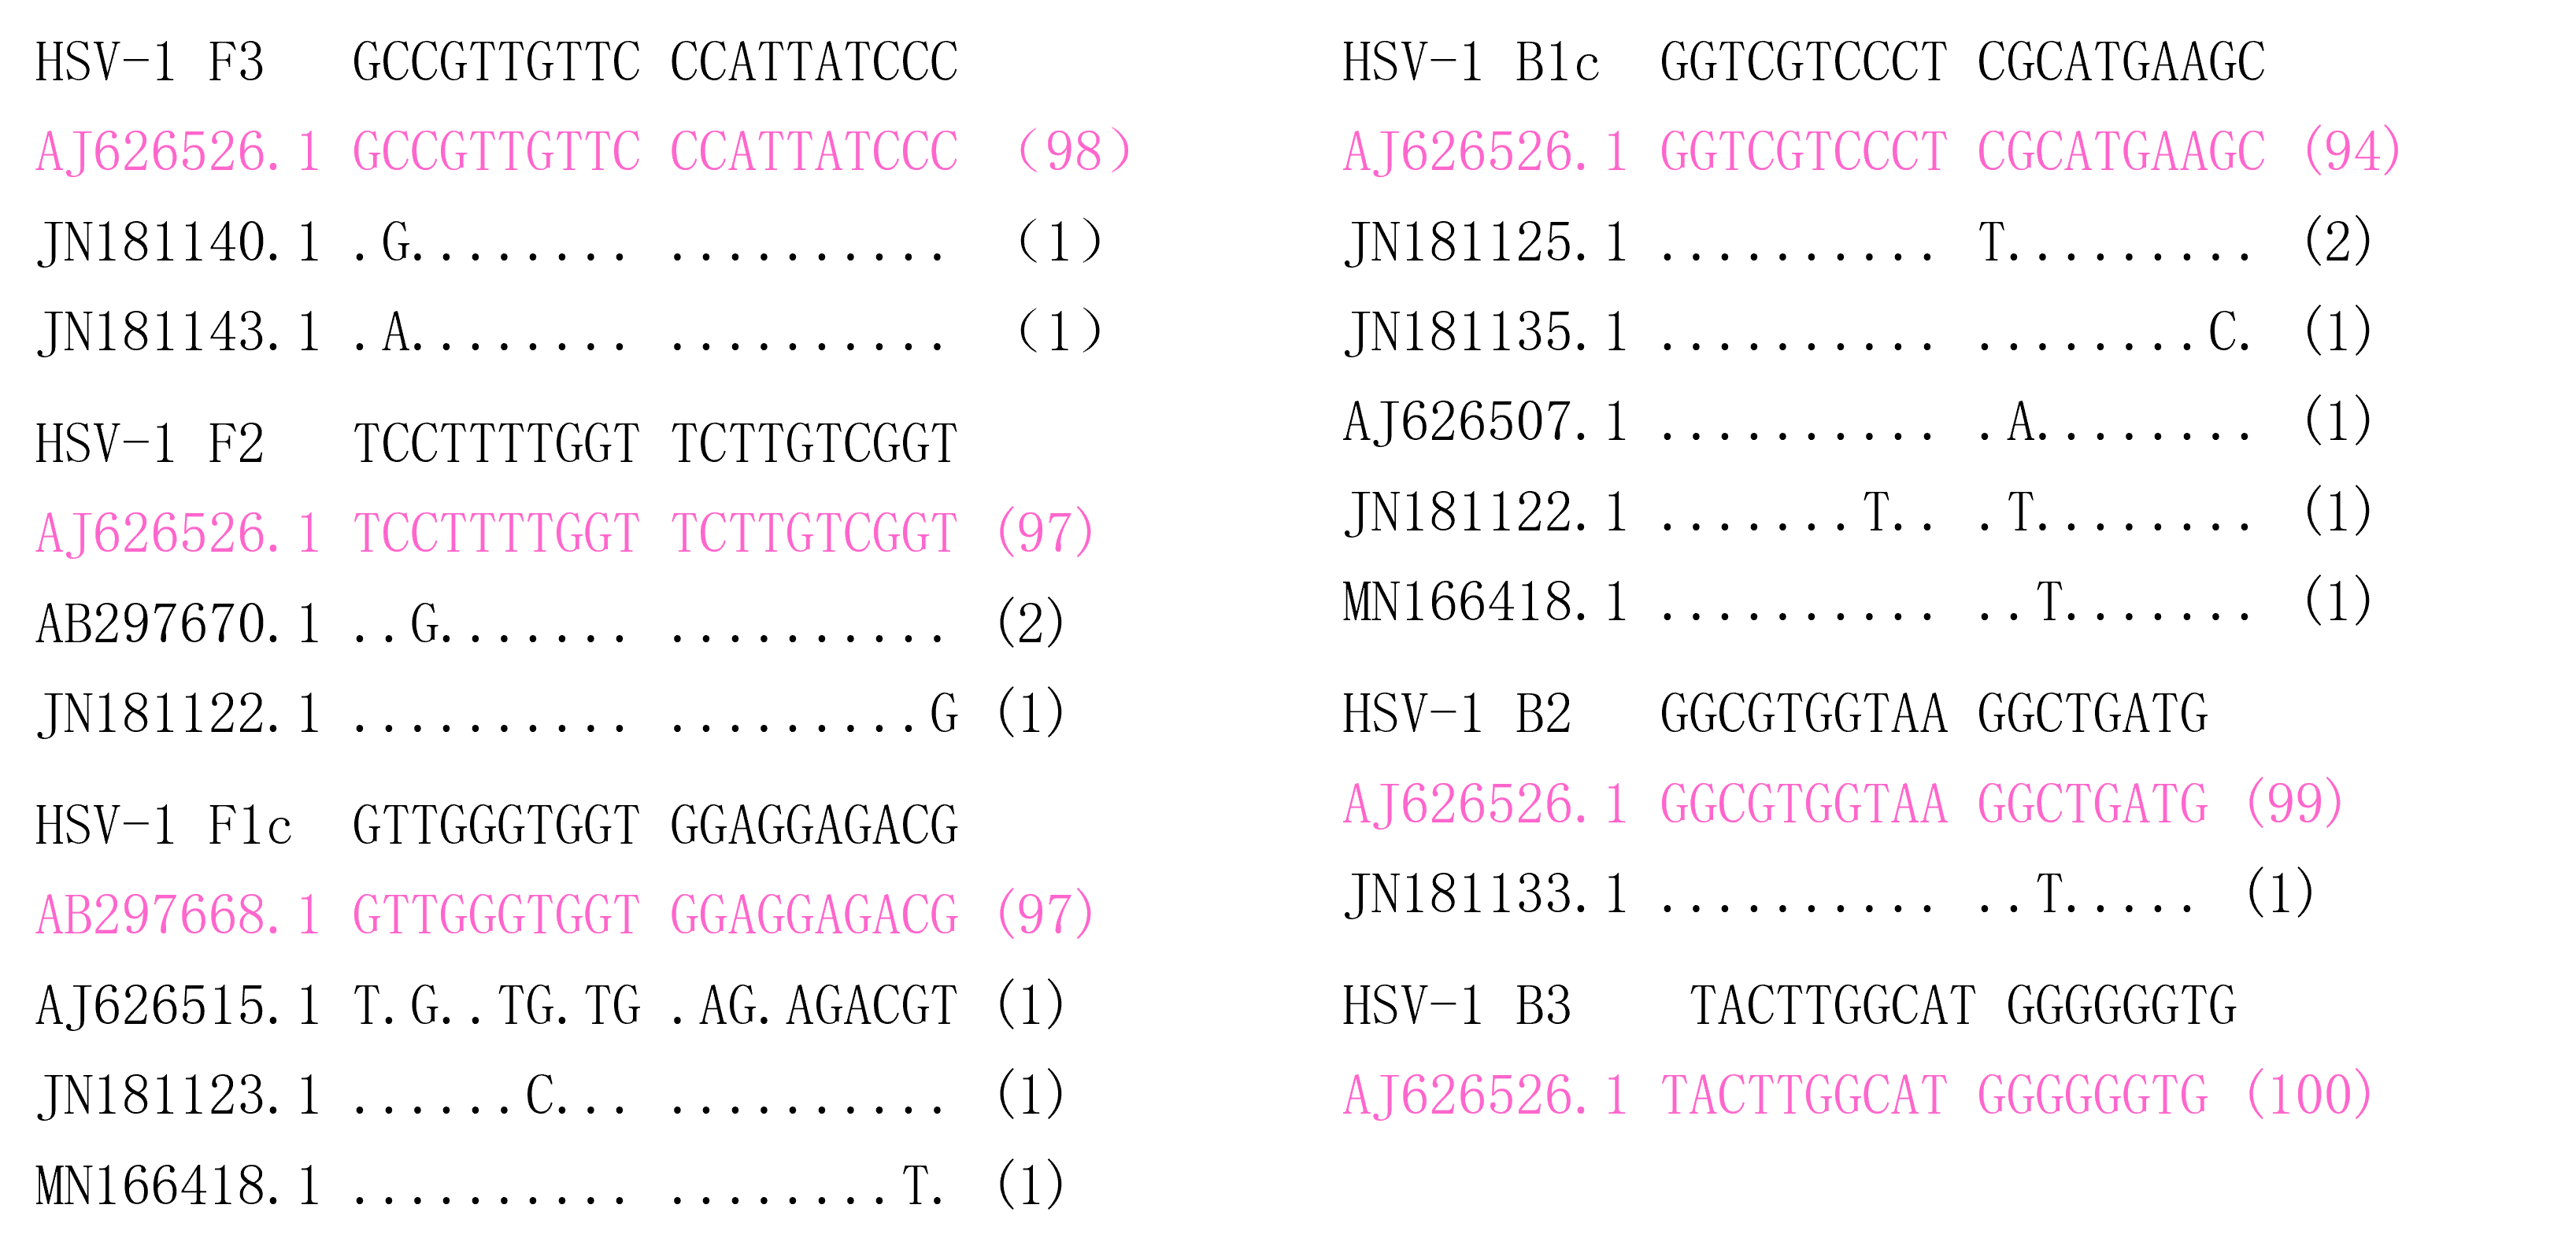
**

**Fig. S1. Sequence alignmentsof the primer binding regions of HSV-1.**

A total of 100 HSV-1 sequences were downloaded from National Center for Biotechnology Information (NCBI) (https://www.ncbi.nlm.nih.gov/) on May, 2025. The sequence number of each unique sequence/variant is shown in parenthesis. Dot, identity with the topmost sequence.

**Supplementary References**

1 Reddy, A. K., Balne, P. K., Reddy, R. K., Mathai, A. & Kaur, I. Loop-mediated isothermal amplification assay for the diagnosis of retinitis caused by herpes simplex virus-1. *Clin Microbiol Infect* **17**, 210-213 (2011).

2 Enomoto, Y. *et al.* Rapid diagnosis of herpes simplex virus infection by a loop-mediated isothermal amplification method. *J Clin Microbiol* **43**, 951-955 (2005).

3 Li, Y. *et al.* A Novel 2-dimensional Multiplex qPCR Assay for Single-Tube Detection of Nine Human Herpesviruses. *Virol Sin* **36**, 746-754 (2021).
